# Supplementary material for: Ex vivo spectroscopic characterisation of the biological activity of pancreatic cyst fluid
Source: Royal Society of Chemistry journal article supplement (doi:10.1039/d5an00230c), 2025-01-01
Supplement: d5an00230c1.pdf [file d5an00230c1.pdf]

*Supplementary information*

# Ex-vivo spectroscopic characterisation of the biological activity of pancreatic cyst fluid

Outmane Bouzerda<sup>1,2\*</sup>, Laura E. Kane<sup>3</sup>, Gregory S. Mellotte<sup>4</sup>, Barbara M. Ryan<sup>4</sup>, Stephen G. Maher<sup>3</sup>, Olivier Piot<sup>1,5\*</sup>, Aidan D. Meade<sup>2\*</sup>

<sup>1</sup> BioSpectroscopie Translationnelle (BioSpecT) EA7506, Université de Reims Champagne-Ardenne, Reims, France.

<sup>2</sup> School of Physics & Clinical & Optometric Sciences, Technological University Dublin, Kevin Street, Dublin D08 NF82, Ireland.

<sup>3</sup> Department of Surgery, Trinity St. James's Cancer Institute, Trinity Translational Medicine Institute, Trinity College Dublin, Dublin D08 W9RT, Ireland.

<sup>4</sup> Department of Gastroenterology, Trinity College Dublin, Tallaght University Hospital, Dublin 24, Ireland.

<sup>5</sup> Plateforme d'Imagerie Cellulaire ou Tissulaire (PICT), Université de Reims Champagne-Ardenne, Reims, France.

\*These authors contributed equally to this study.

## Experimental workflow

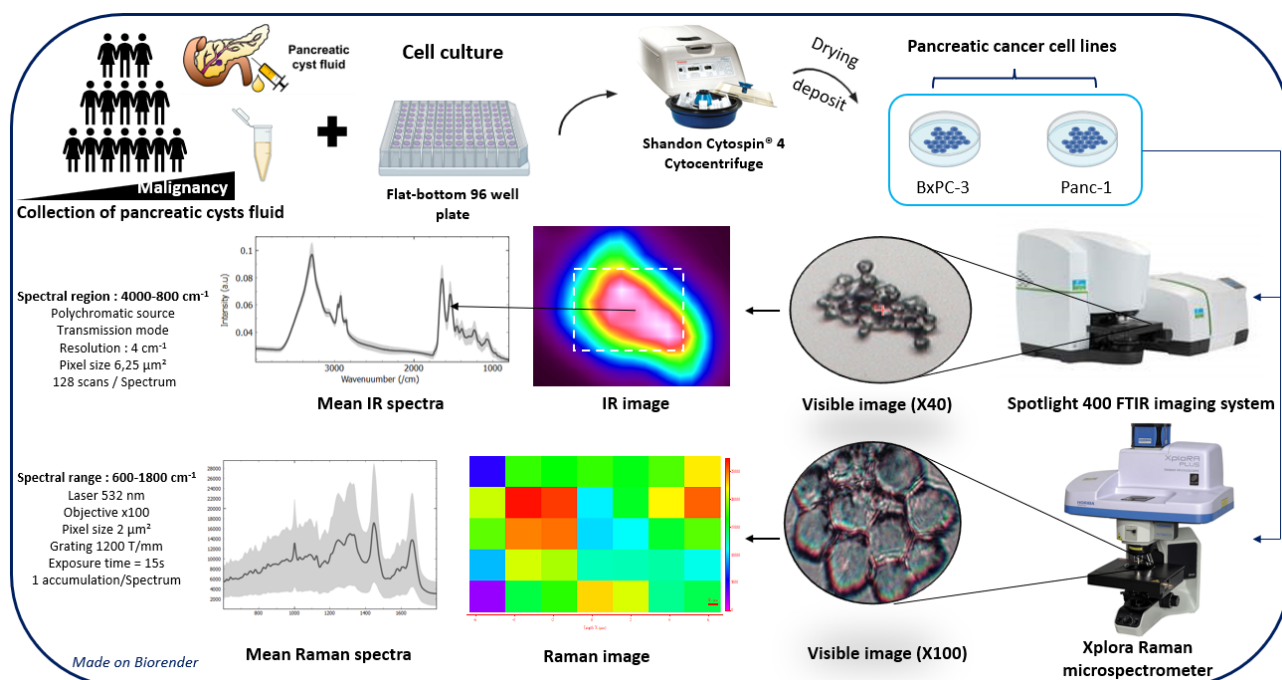

**Figure S1:** Experimental workflow of this study.

# Preprocessing workflow of FTIR images in OCTAVVS

## Preprocessing

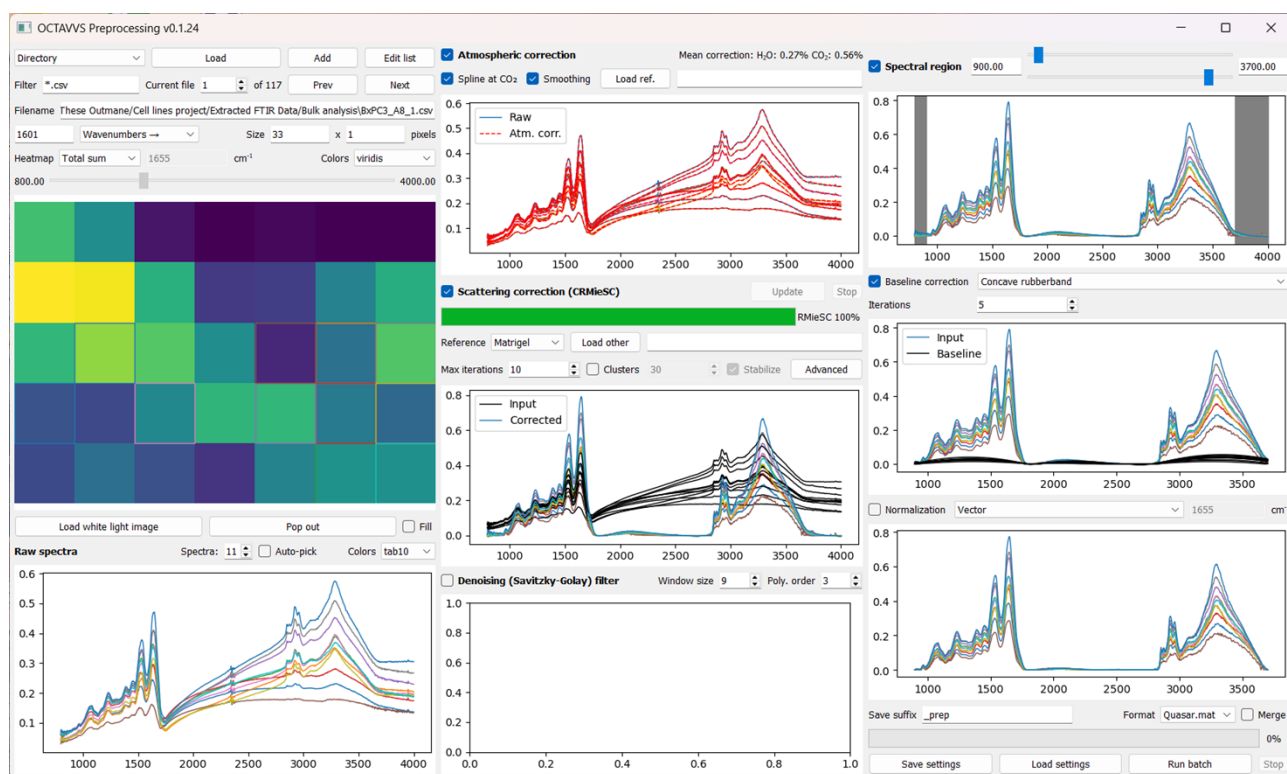

**Figure S2:** An example of preprocessing steps of FTIR images performed on BxPC-3 and PANC-1 cells in OCTAVVS preprocessing after background removal using Kmeans clustering.

# PCA results of Raman data for BxPC-3 and PANC-1 prior to PCF exposure

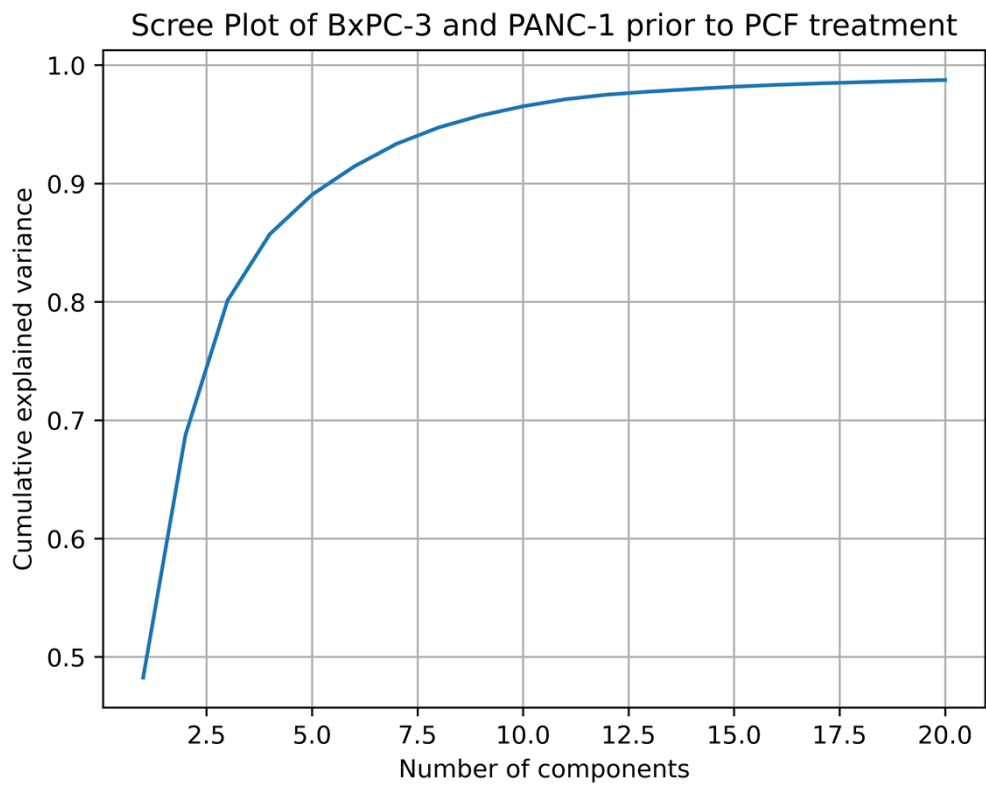

**Figure S3a:** Scree plot of Raman data for BxPC-3 and PANC-1 prior to PCF exposure.

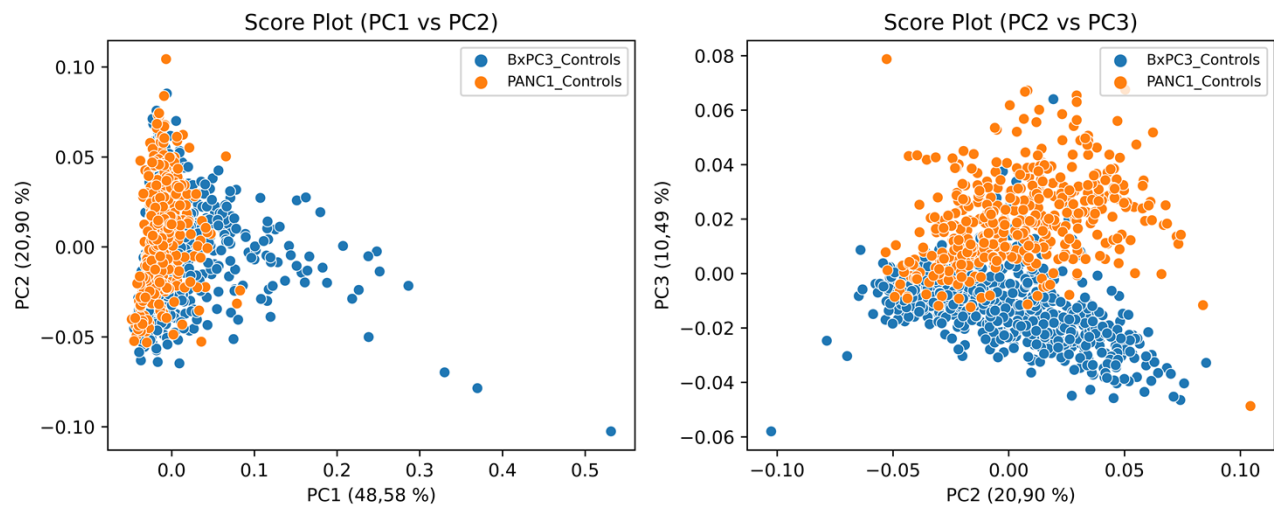

**Figure S3b:** Scores plot of Raman data for BxPC-3 and PANC-1 prior to PCF exposure.

## PCA results of FTIR data for BxPC-3 and PANC-1 prior to PCF exposure

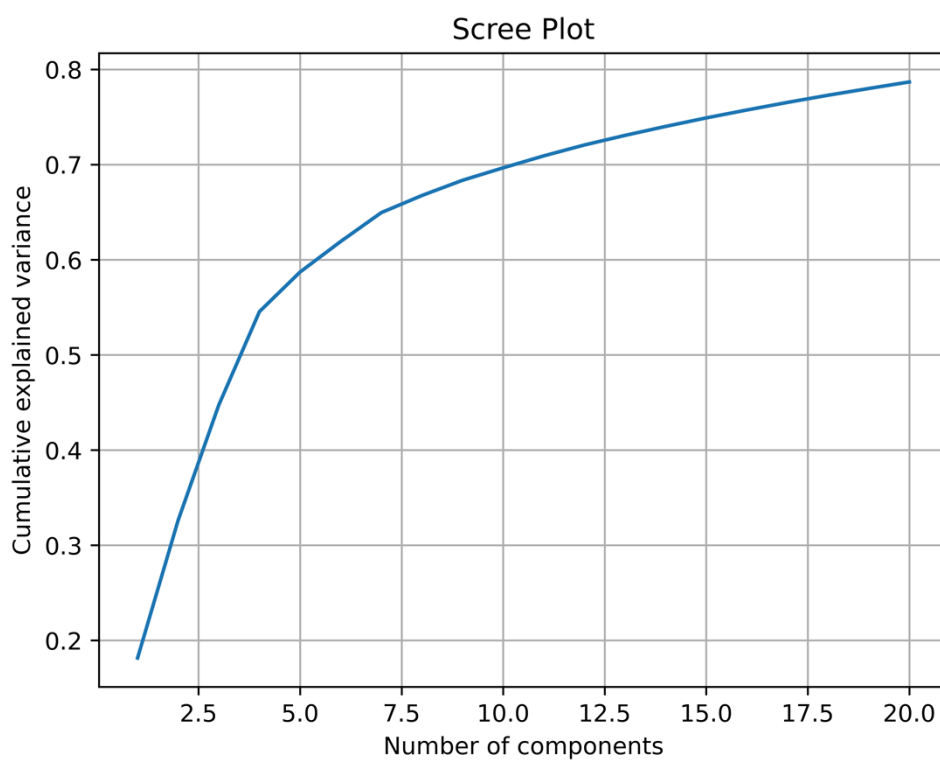

**Figure S4a:** Scree plot of FTIR data for BxPC-3 and PANC-1 prior to PCF exposure.

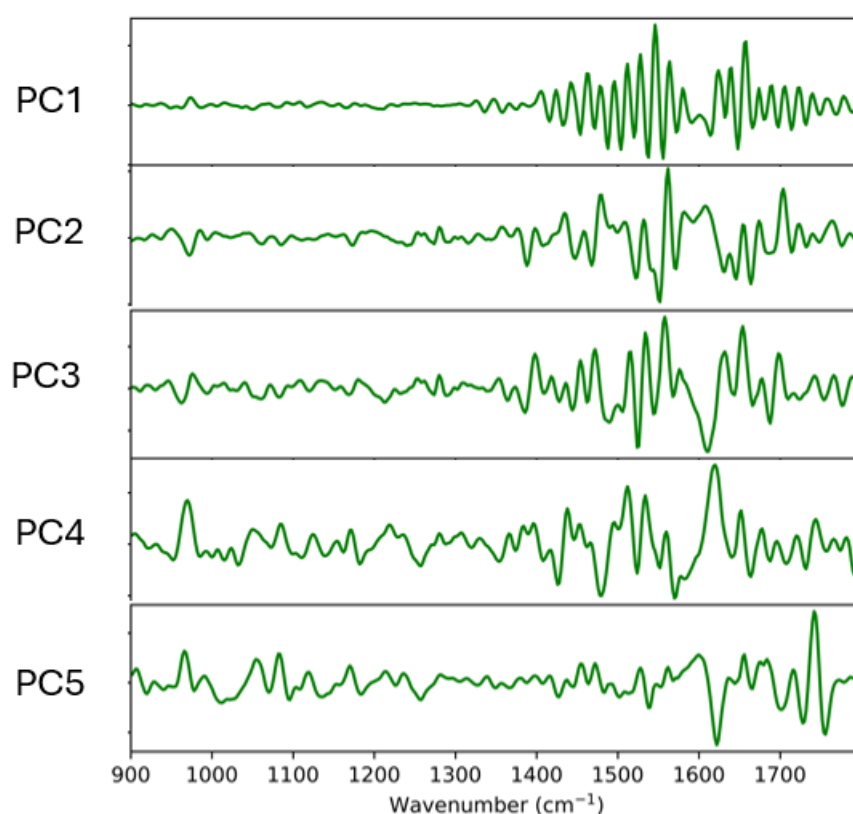

**Figure S4b:** Loading plot for FTIR data of BxPC-3 and PANC-1 cells pre-exposure to PCF.

## PCA results of FTIR data for BxPC-3 and PANC-1 post-exposure to PCF

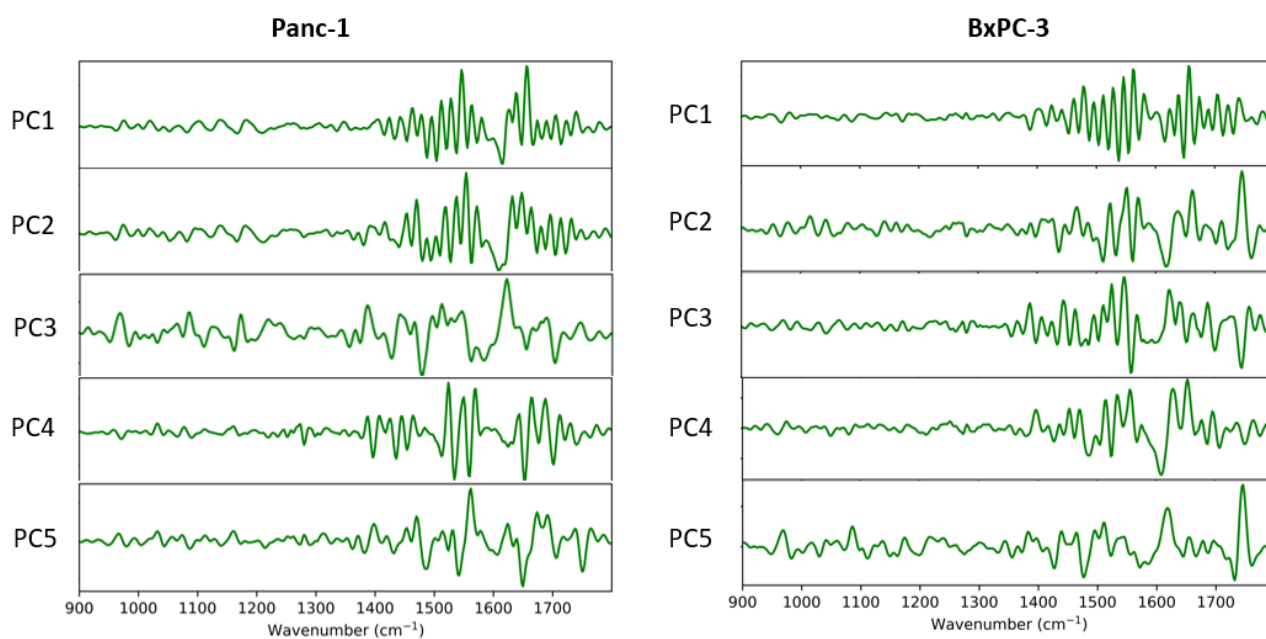

**Figure S5:** Loadings plot for FTIR of BxPC-3 and PANC-1 cells post-exposure to PCF.

## PCA results of Raman data for BxPC-3 vs PANC-1 pre- and post-exposure to PCF

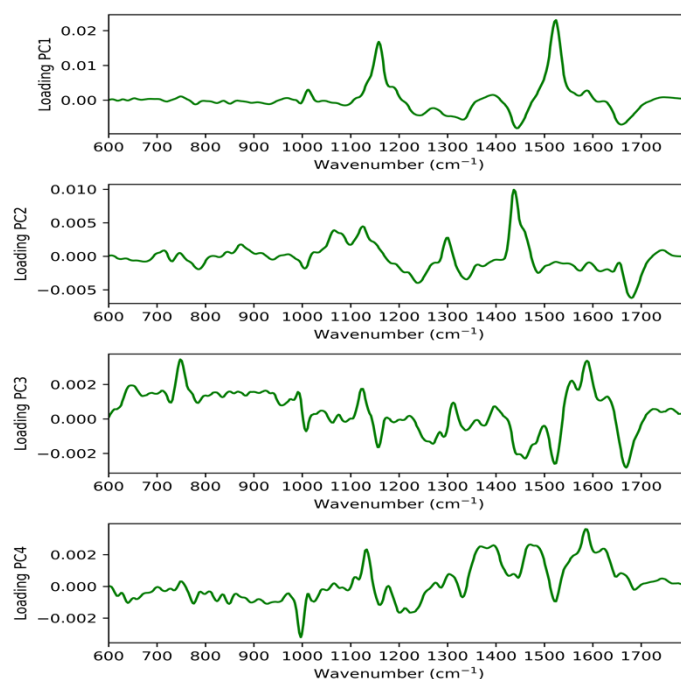

**Figure S6:** Loadings plot of Raman data comparing BxPC-3 with PANC-1 cells post PCF-treatment.
